# Supplementary material
Source: PubMed Central journal article supplement (PMC9974559)
Supplement: NIHMS1828485-supplement-Supplemental_Digital_Content_to_Be_Published__cited_in_text_.pdf [file NIHMS1828485-supplement-Supplemental_Digital_Content_to_Be_Published__cited_in_text_.pdf]

## Supplementary Data

Table S1: In vitro antimicrobial susceptibility tests showing susceptible results for 121 *Nocardia* isolates from solid organ transplant recipients

|                               | <b>Susceptible (N = 121)</b> |
|-------------------------------|------------------------------|
| Amikacin                      | 113 (93.4)                   |
| Amoxicillin-clavulanate       | 49 (40.5)                    |
| Cefepime                      | 28 (23.1)                    |
| Ceftriaxone                   | 40 (33.1)                    |
| Ciprofloxacin                 | 32 (26.4)                    |
| Clarithromycin                | 50 (41.3)                    |
| Doxycycline                   | 20 (16.5)                    |
| Imipenem                      | 86 (71.1)                    |
| Linezolid                     | 121 (100)                    |
| Minocycline                   | 40 (33.1)                    |
| Moxifloxacin                  | 53 (52.1)                    |
| Tobramycin                    | 58 (47.9)                    |
| Trimethoprim-sulfamethoxazole | 114 (94.2)                   |

Data are *n* (%).

Supplementary Table 2: Antibiotics used within the initial 4 weeks of therapy for 125 solid organ transplant patients with nocardiosis

|                                                      | Non-disseminated (N=102) | Disseminated (N=33) | Total (N=125) |
|------------------------------------------------------|--------------------------|---------------------|---------------|
| Number of antibiotics, mean (SD)                     | 2.0 (0.7)                | 2.4 (0.7)           | 2.1 (0.8)     |
| Number of active antibiotics, mean (SD) <sup>a</sup> | 1.7 (0.7)                | 2.0 (0.7)           | 1.8 (0.8)     |
| ≥ 2 initial antibiotics                              | 66 (71.7)                | 31 (93.9)           | 97 (77.6)     |
| ≥ 2 initial active antibiotics <sup>a</sup>          | 49 (55.7)                | 25 (75.8)           | 74 (61.2)     |
| Sulfa antibiotics                                    | 62 (67.4)                | 30 (90.9)           | 92 (73.6)     |
| - TMP-SMX                                            | 59 (64.1)                | 26 (78.8)           | 85 (68.0)     |
| - Sulfadiazine                                       | 3 (3.3)                  | 4 (12.1)            | 7 (5.6)       |
| Carbapenem                                           | 27 (29.3)                | 19 (57.6)           | 46 (36.8)     |
| - Imipenem                                           | 14 (15.2)                | 12 (36.4)           | 26 (20.8)     |
| - Meropenem                                          | 13 (14.1)                | 7 (21.2)            | 20 (16.0)     |
| Fluoroquinolone                                      | 22 (23.9)                | 6 (18.2)            | 28 (22.4)     |
| - Ciprofloxacin                                      | 7 (7.6)                  | 2 (6.1)             | 9 (7.2)       |
| - Levofloxacin                                       | 3 (3.3)                  | 0 (0.0)             | 3 (2.4)       |
| - Moxifloxacin                                       | 12 (13.0)                | 4 (12.1)            | 16 (12.8)     |
| Macrolide                                            | 9 (9.8)                  | 2 (6.1)             | 11 (8.8)      |
| - Azithromycin                                       | 3 (3.3)                  | 2 (6.1)             | 5 (4.0)       |
| - Clarithromycin                                     | 6 (6.5)                  | 0 (0.0)             | 6 (4.8)       |
| Amikacin                                             | 2 (2.2)                  | 1 (3.0)             | 3 (2.4)       |
| Amoxicillin-clavulanate                              | 9 (9.8)                  | 0 (0.0)             | 9 (7.2)       |
| Ceftriaxone                                          | 13 (14.1)                | 3 (9.1)             | 16 (12.8)     |
| Doxycycline                                          | 2 (2.2)                  | 0 (0.0)             | 2 (1.6)       |
| Linezolid                                            | 14 (15.2)                | 11 (33.3)           | 25 (20.0)     |
| Minocycline                                          | 24 (26.1)                | 6 (18.2)            | 30 (24.0)     |
| Tigecycline                                          | 1 (1.1)                  | 0 (0.0)             | 1 (0.8)       |

Data are n (%) unless otherwise specified.

Abbreviations: SD, standard deviation; TMP-SMX, trimethoprim-sulfamethoxazole.

<sup>a</sup>n = 121, excluding 4 patients with non-disseminated nocardiosis whose isolate was unable to grow on susceptibility media.
